# Supplementary material
Source: MDPI journal article supplement (https://www.mdpi.com/2073-4352/14/4/318)
Supplement: s1 [file s1]

### Supplementary Information

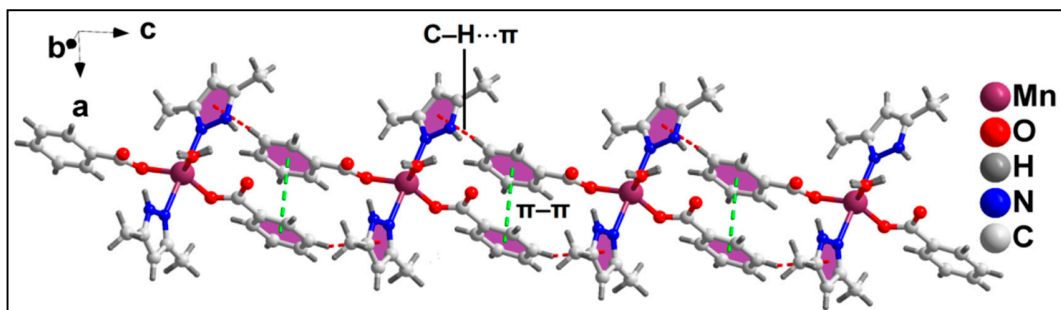

**FigureS1** 1D chain of compound **1** involving intermolecular C-H... $\pi$  and  $\pi$ -stacking interactions along the crystallographic c axis

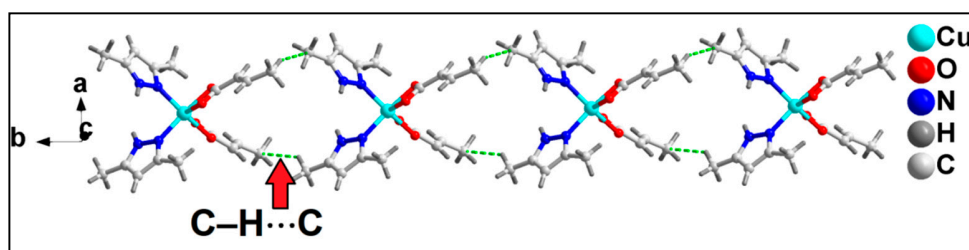

**FigureS2** 1D supramolecular chain of compound **2** assisted by non-covalent C-H...C interactions along the crystallographic b axis

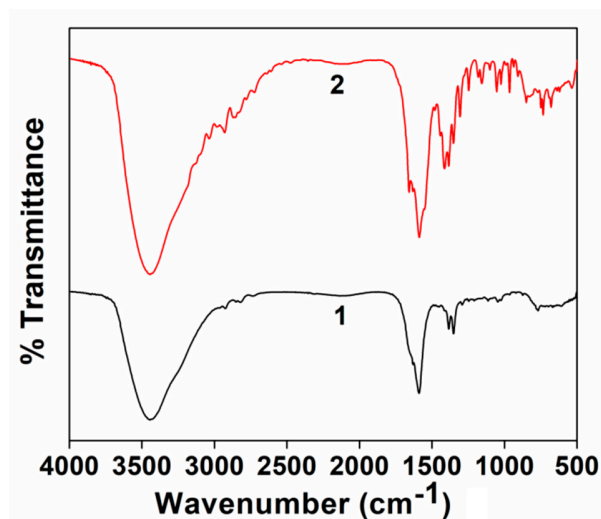

**FigureS3** FT-IR spectra of compounds **1** and **2**

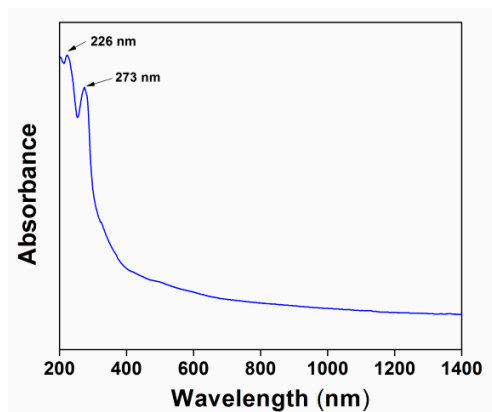

**FigureS4(a)** UV-Vis-NIR spectrum of compound 1

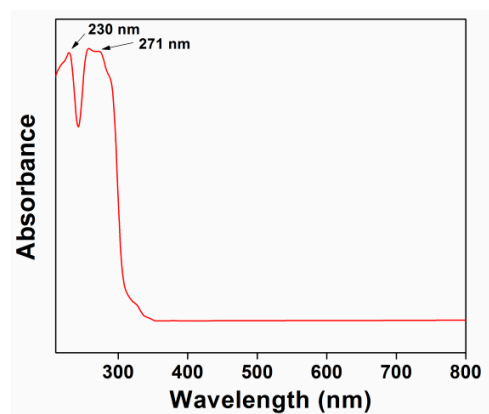

**(b)** UV-Vis spectrum of 1

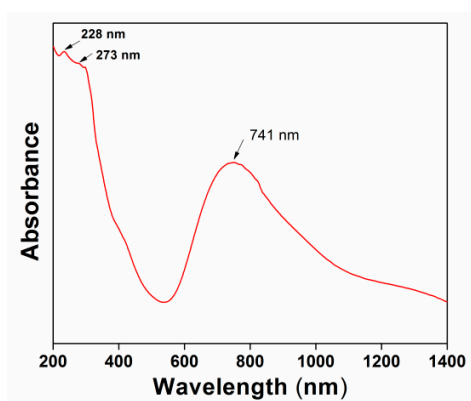

**FigureS5(a)** UV-Vis-NIR spectrum of compound 2

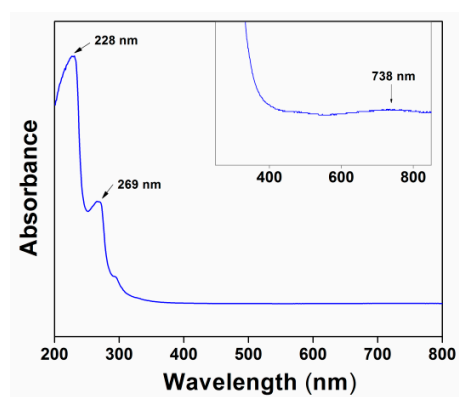

**(b)** UV-Vis spectrum of 2.

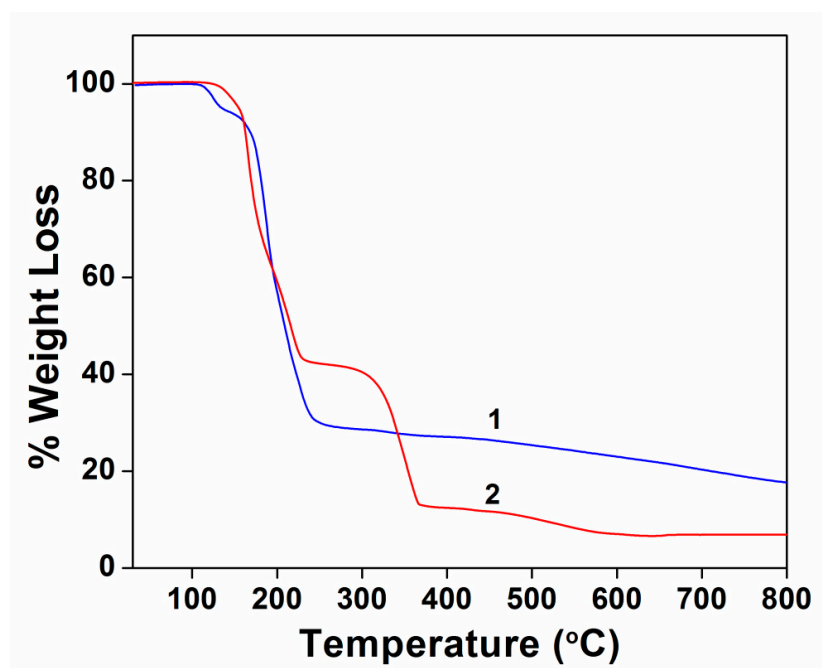

**FigureS6** Thermogravimetric curves of the compounds **1** and **2**.
