# Supplementary material
Source: MDPI journal article supplement (https://www.mdpi.com/2073-4352/14/4/318)
Supplement: s1 [file s1]

Archive with 5 entries (5 files):
- CuCl2_crotonate_DMP.cif
- CuCl2_crotonate_DMP.pdf
- MnCl2_DMP_bz.cif
- MnCl2_DMP_bz.pdf
- Supplementary Information.pdf
